# Supplementary material for: Association of small airways obstruction and mortality
Source: Research Square preprint supplement (doi:10.21203/rs.3.rs-6940442/v1), 2025-07-27
Supplement: Supplementary file 1 [file acd8fcb58b25851413bfa18b.docx]

**ADDITIONAL FILE 1**


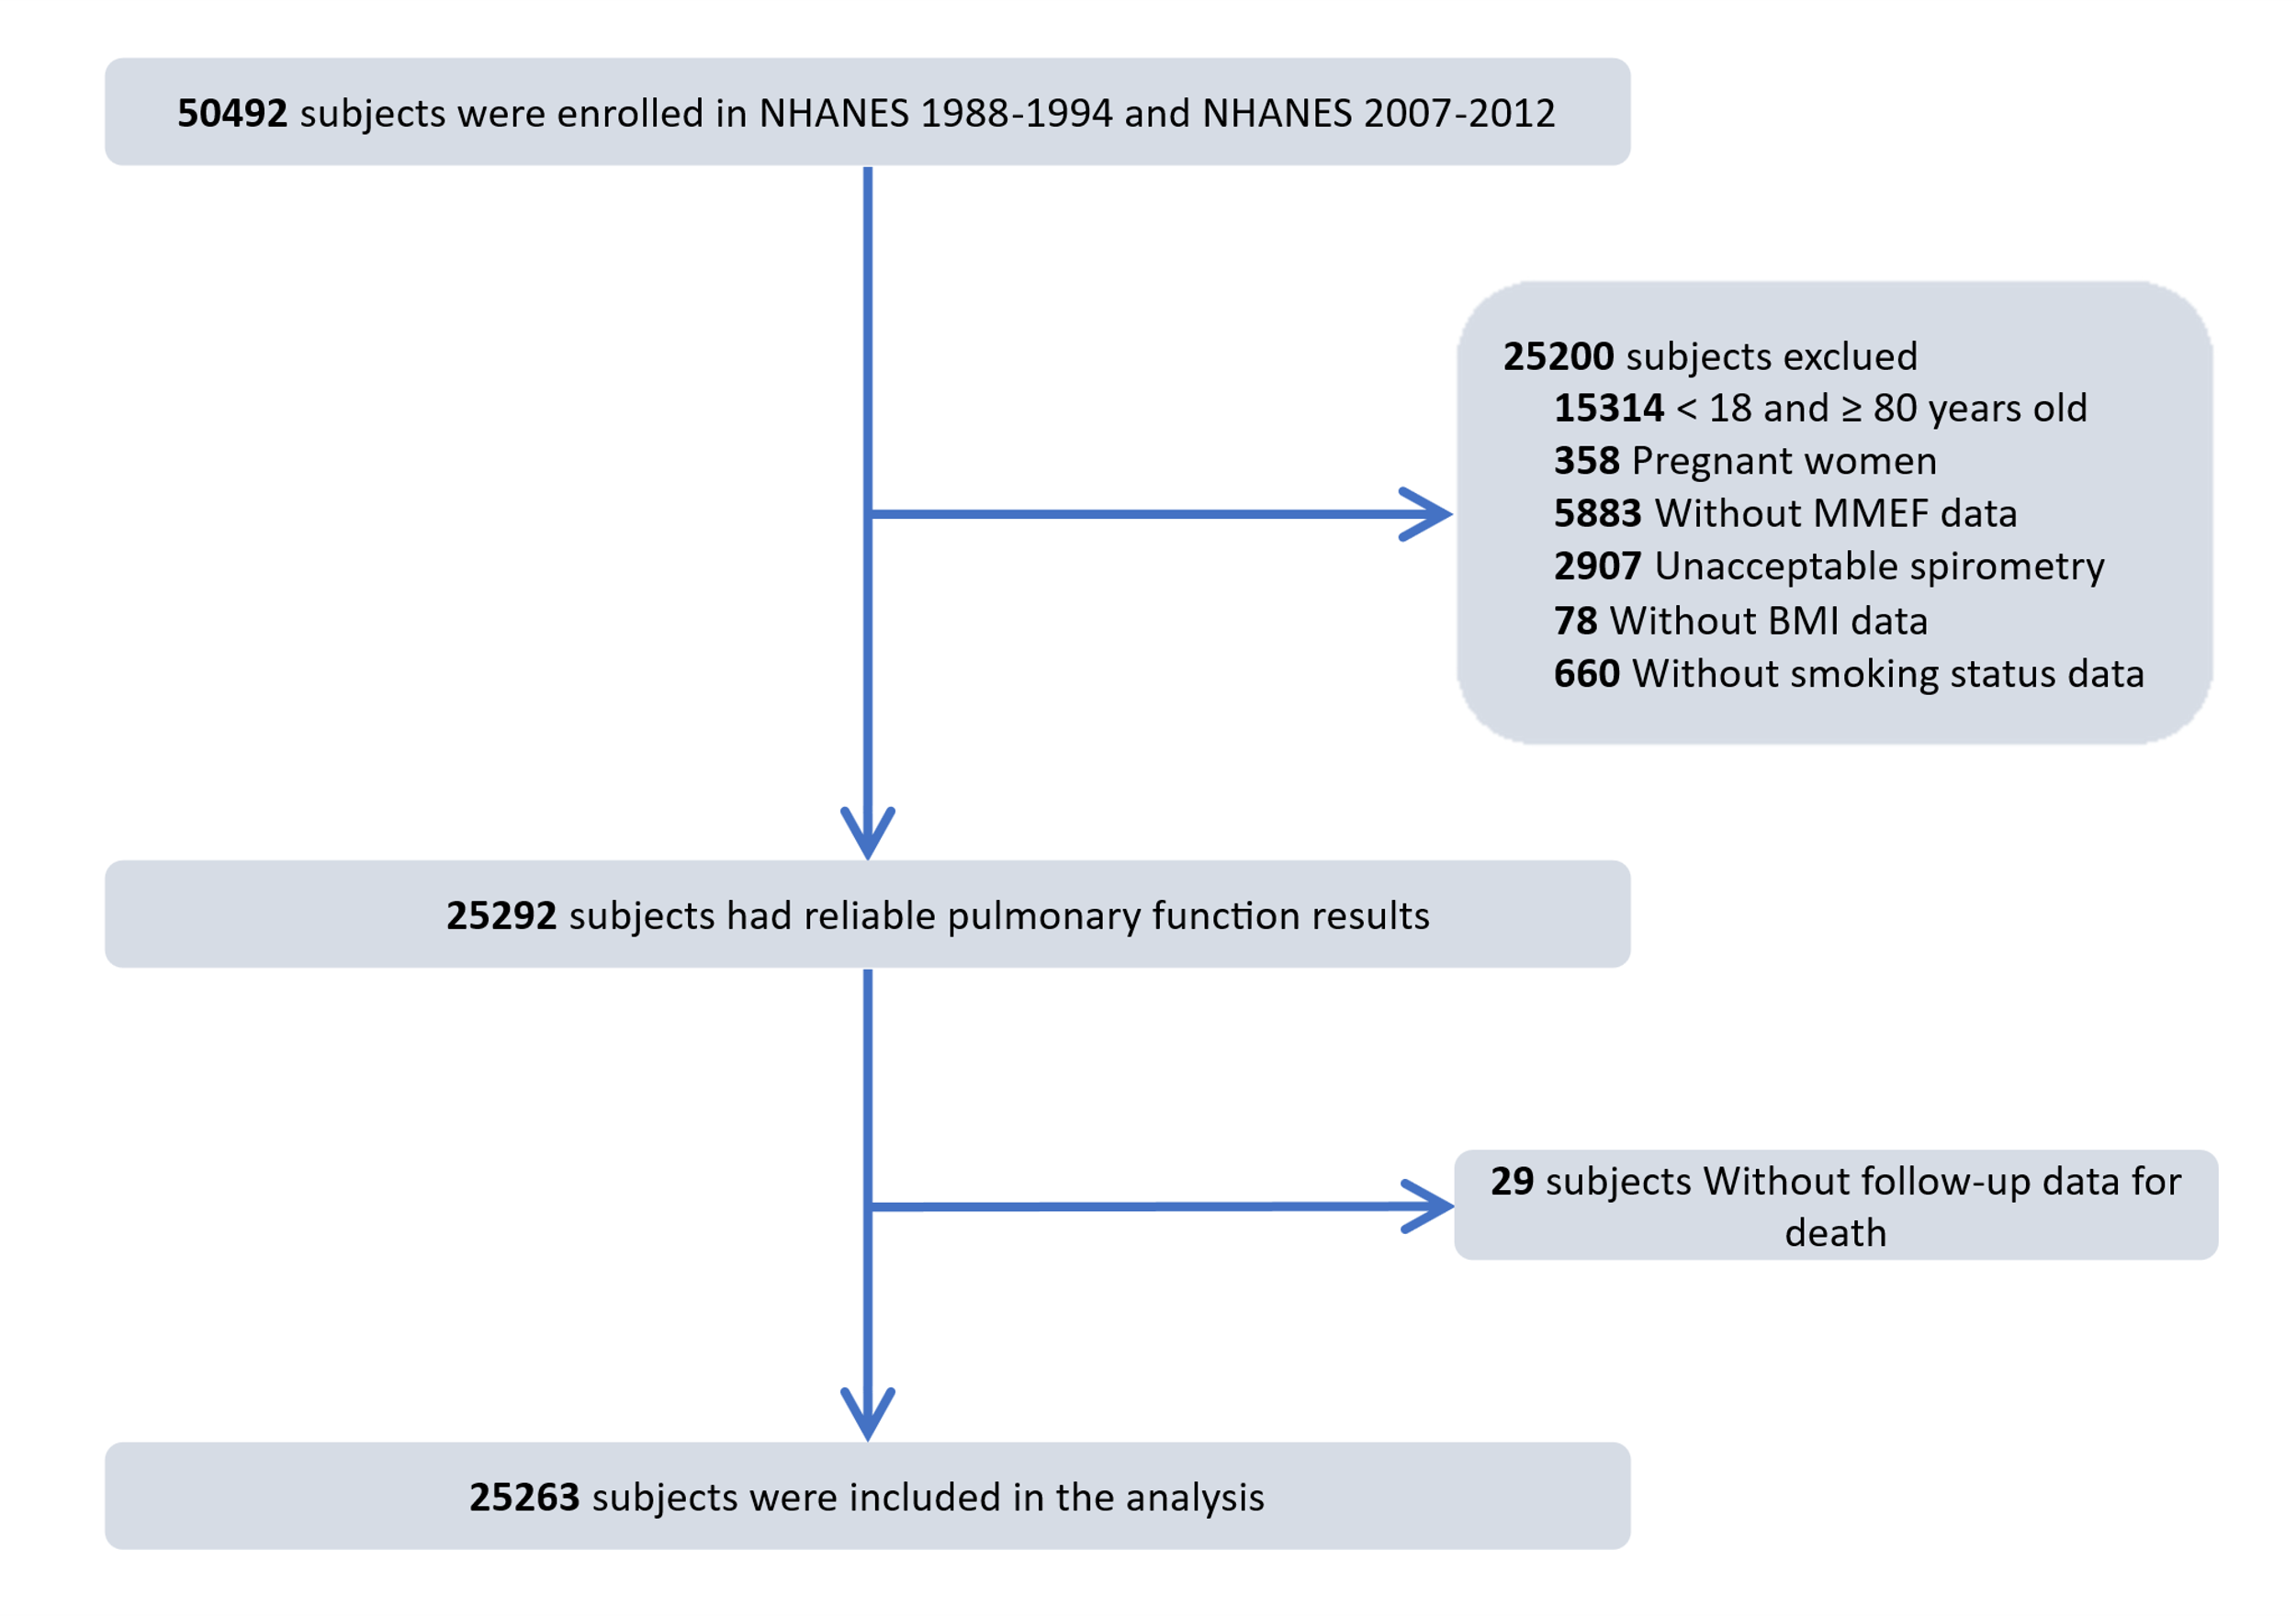


**Figure S1. Study flow chart.**

Abbreviation: **MMEF**: maximal mid-expiratory flow; **BMI:** body mass index.

**
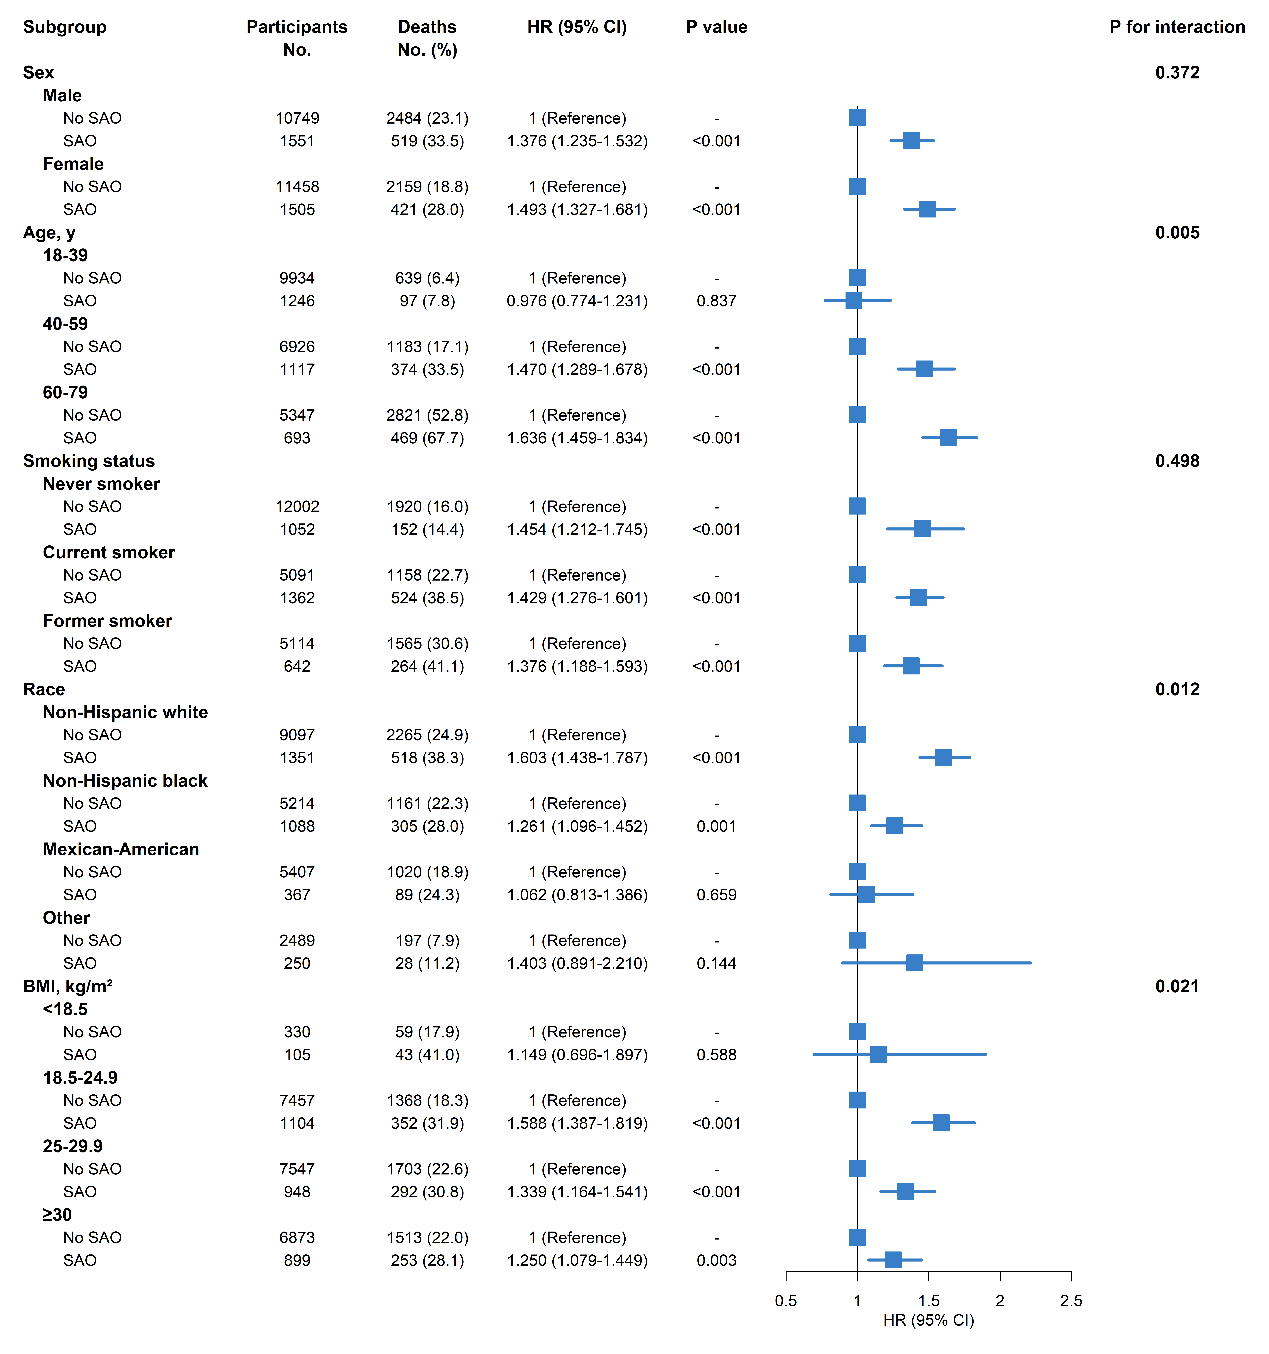
**

**Figure S2. Subgroup analysis of the multivariate association between small airways obstruction and risk of all-cause mortality in the overall population.** Abbreviation: **NO.**: numbers; **HR**: hazard ratio; **CI**: confidence interval; **BMI:** body mass index. Adjusted for sex, age, race, body mass index, education level, poverty income ratio, smoking status, hypertension, diabetes, congestive heart failure, stroke, asthma, emphysema, chronic bronchitis, and cancer.

**
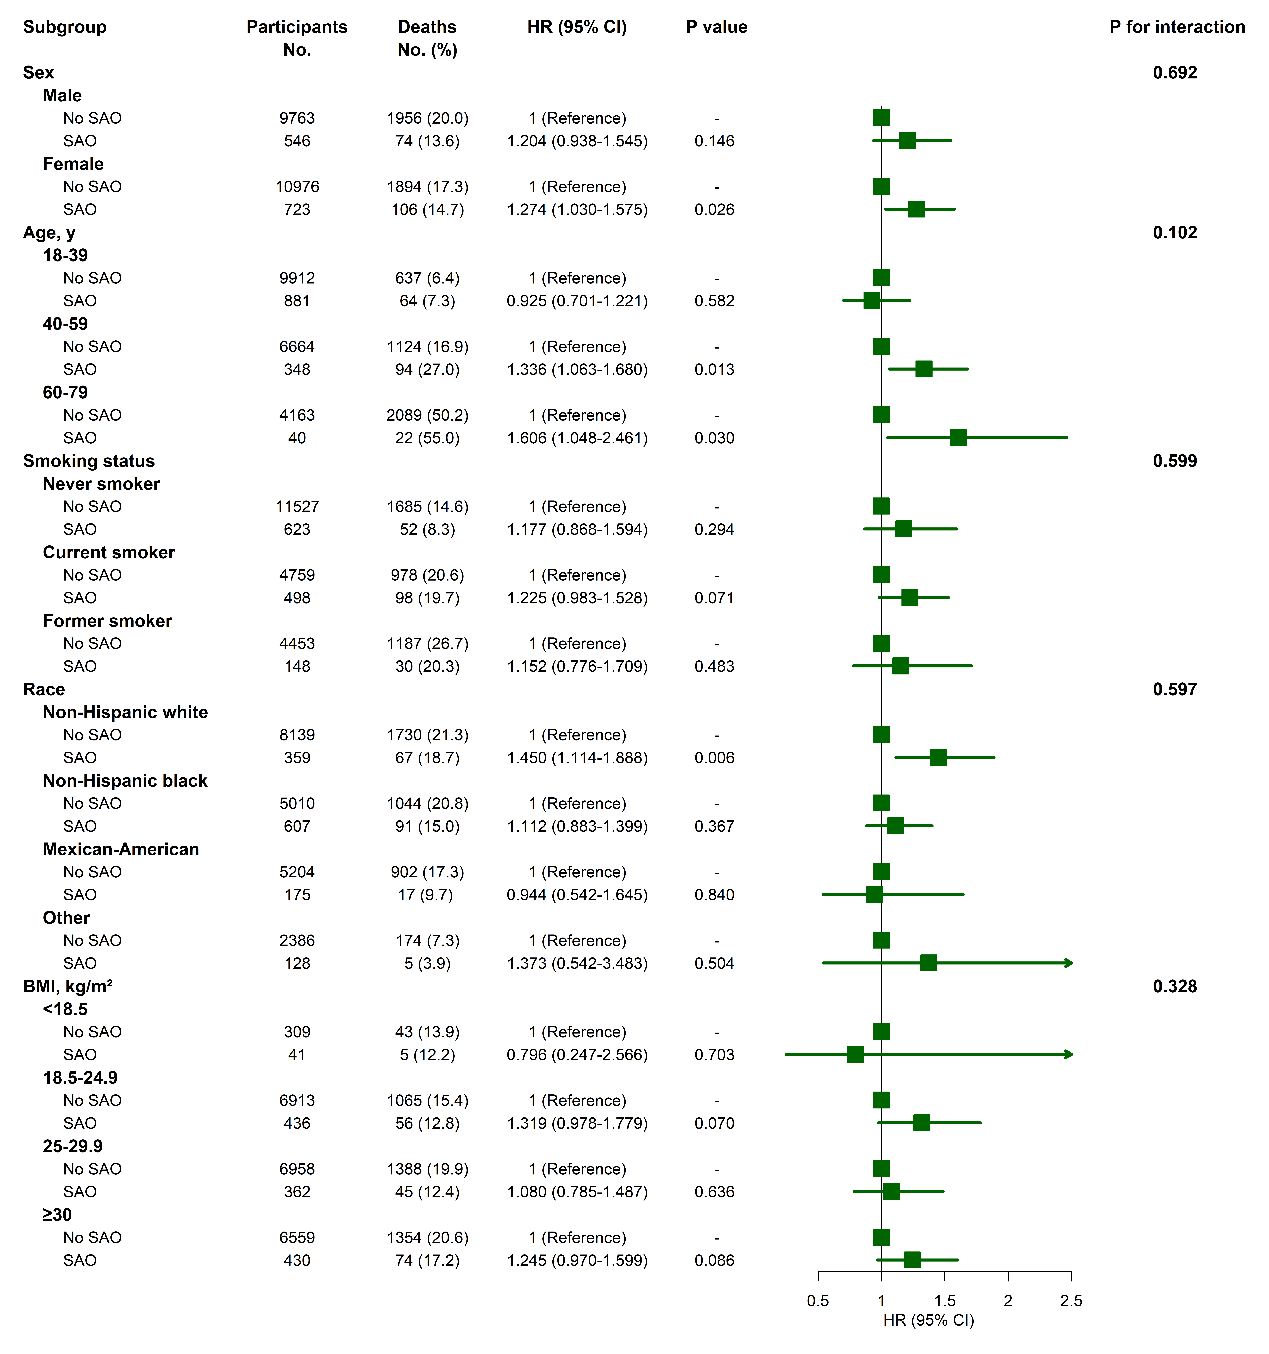
**

**Figure S3. Subgroup analysis of the multivariate association between small airways obstruction and risk of all-cause mortality** among the participants with normal spirometry. Abbreviation: **NO.**: numbers; **HR**: hazard ratio; **CI**: confidence interval; **BMI:** body mass index. Adjusted for sex, age, race, body mass index, education level, poverty income ratio, smoking status, hypertension, diabetes, congestive heart failure, stroke, asthma, emphysema, chronic bronchitis, and cancer.
